# Supplementary material for: RNAseq, transcriptome analysis and identification of DEGs involved in development and ripening of Fragaria chiloensis fruit
Source: Frontiers journal article supplement (doi:10.3389/fpls.2022.976901), 2022-09-20
Supplement: Image_1.pdf [file Image_1.pdf]

## Supplementary Material

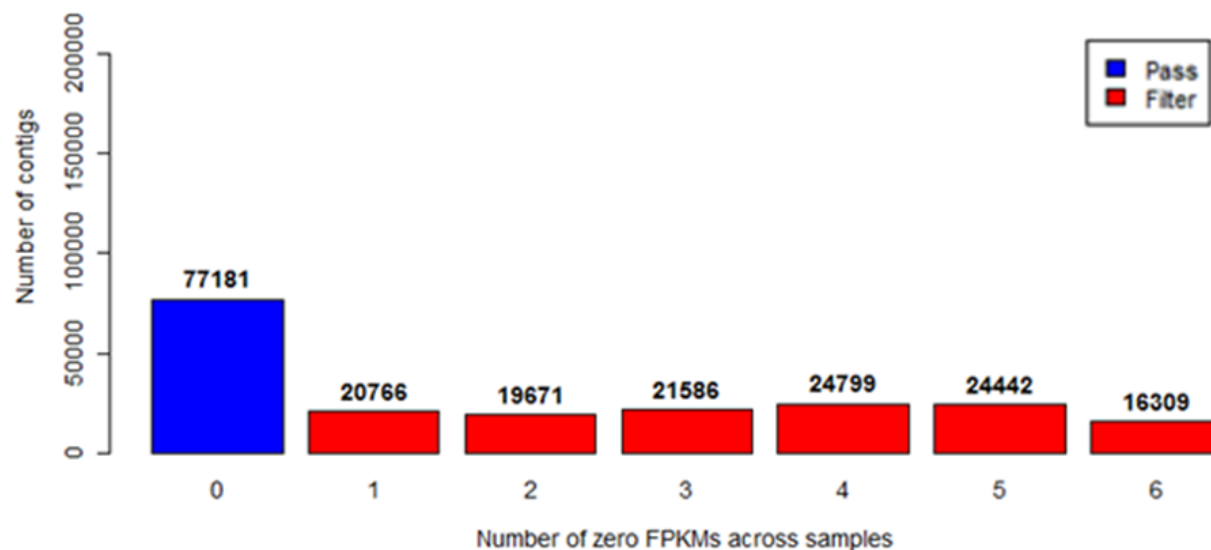

**Supplementary Figure 1.** Analysis of expression values of the contigs assembled from *F. chiloensis* libraries. The FPKM values of 127,573 contigs were compared within the different RNA-seq libraries. The contigs were classified according to the number of zero FPKM values in the samples. A total of 77,181 contigs continued in the analysis.
