# Supplementary material for: RNAseq, transcriptome analysis and identification of DEGs involved in development and ripening of Fragaria chiloensis fruit
Source: Frontiers journal article supplement (doi:10.3389/fpls.2022.976901), 2022-09-20
Supplement: Image_2.pdf [file Image_2.pdf]

## Supplementary Material

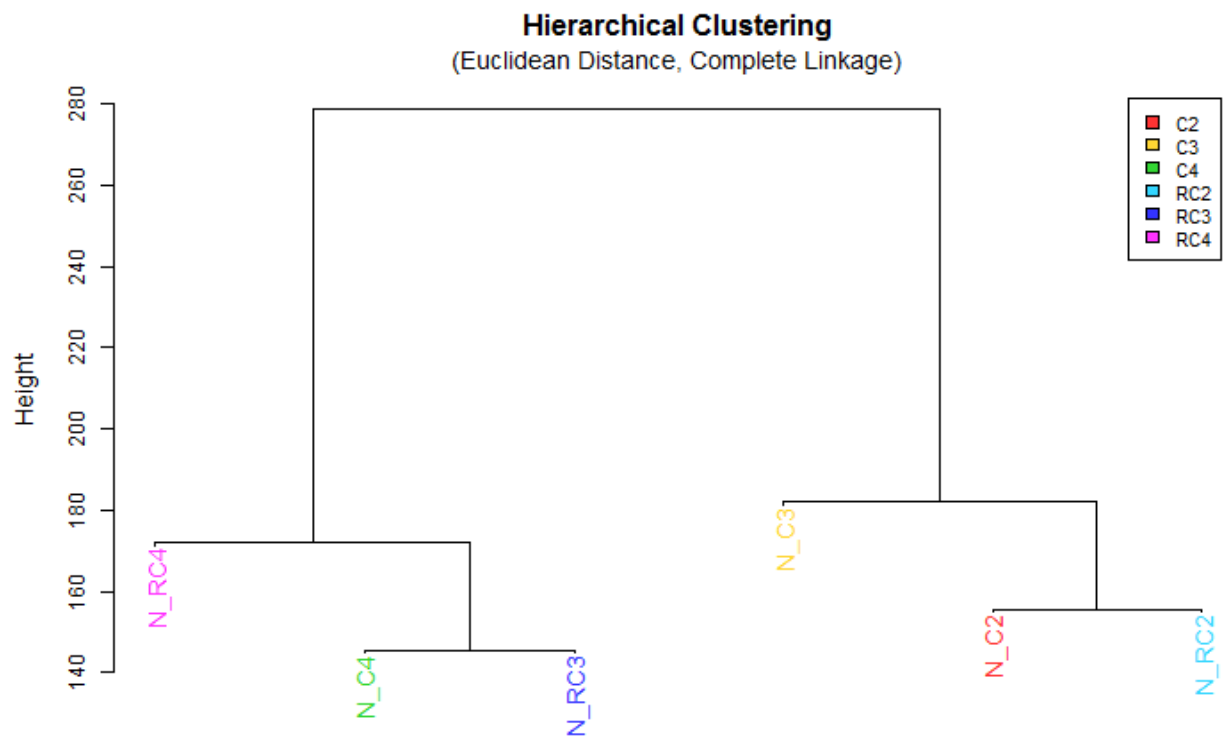

**Supplementary Figure 2.** Hierarchical clustering of RNA-seq libraries.
