# Supplementary material for: RNAseq, transcriptome analysis and identification of DEGs involved in development and ripening of Fragaria chiloensis fruit
Source: Front Plant Sci. 2022 Sep 20;13:976901. doi: 10.3389/fpls.2022.976901 (PMC9530326; doi:10.3389/fpls.2022.976901)
Supplement: Supplementary file 7 [file Data_Sheet_1.xlsx]

## Sheet: Fig.5
Heatmap_NAME	Sequence_ID	FPKM_C2	FPKM_C3	FPKM_C4	FPKM_RC2	FPKM_RC3	FPKM_RC4	ORF
ZEP_1	comp4530_c0_seq1	36.61	40	21.76	43.61	24.32	21.74	YES
ABA-induced_1	comp25520_c0_seq1	3.49	0.44	0.45	1.1	0.43	0.33	YES
ARM_1	comp1696_c0_seq1	4.05	10.03	16.97	11.43	14.66	6.44	YES
ARM_2	comp5750_c0_seq2	0.9	8.67	7.07	4.98	3.42	5.56	YES
ARM_3	comp5750_c0_seq3	2.02	0.05	0.45	2.02	3.54	3.22	YES
bZIP_1	comp10476_c0_seq1	8.8	12.21	2.38	4.06	4.18	5.15	YES
bZIP_2	comp8717_c0_seq5	1.55	7.49	6.73	4.86	5.6	2.02	YES
bZIP_3	comp8717_c0_seq8	5.57	6.65	0.43	2.72	0.06	1.1	YES
Calcium-dependet_1	comp264_c0_seq5	17.89	8.06	2.64	18.5	1.32	9.19	YES
Calcium-dependet_2	comp2962_c0_seq2	0.47	1.7	1.85	1.73	1.7	7.2	YES
Calcium-dependet_3	comp6024_c0_seq1	28.6	24.02	8.63	32.8	10.2	11.34	YES
Calmodulin_2	comp1915_c0_seq9	54.62	51.23	33.29	68.81	30.72	15.46	YES
Calmodulin_3	comp4739_c0_seq2	7.53	3.91	9.25	5.73	10.23	9.48	YES
Calmodulin_4	comp5868_c0_seq1	0.57	0.56	0.39	1.16	2.29	2.41	YES
Carotenoid_1	comp16227_c0_seq2	0.12	0.41	3	0.04	3.16	3.09	YES
Carotenoid_2	comp799_c0_seq1	4.58	5.4	0.77	7.1	4.73	4.68	YES
Carotenoid_3	comp799_c0_seq3	4.81	4.83	5.59	6.16	1.61	3.89	YES
G-protein_1	comp10069_c1_seq1	2.61	2.38	11.71	2.41	10.25	10.75	YES
G-protein_2	comp14279_c0_seq1	2.38	1.66	7.28	2.12	6.3	8.39	YES
GTP-binding_1	comp3907_c0_seq1	13.62	13.36	5.28	24.61	4.62	4.78	YES
GTP-binding_2	comp4367_c0_seq7	6.35	5.59	3.27	5.78	6.36	8.31	YES
GTP-protein_3	comp4822_c0_seq3	1.01	3.14	3.39	4.99	2.05	3.78	YES
ABI_1	comp6945_c0_seq1	23.02	11.26	1.57	9.39	3.56	5.03	YES
ABI_2	comp5549_c2_seq1	9.47	10.99	4.11	13.36	4.22	3.25	YES
ABI_3	comp5549_c2_seq2	22.16	23.5	7.77	24.89	8.98	6.16	YES
MAP-kinase_1	comp2008_c0_seq17	0.24	1.21	0.47	0.02	0.11	1.75	YES
MAP-kinase_2	comp5869_c0_seq2	7.74	4	7.24	5.77	9.2	6.38	YES
Phosphatase-2CA_1	comp5337_c0_seq13	5.44	2.47	2.99	2.35	1.65	0.19	YES
Phosphatase-2CA_2	comp1812_c1_seq2	19.29	18.27	8.87	19.27	12.12	19.11	YES
Phosphatase-2CA_3	comp15291_c0_seq1	0.33	0.98	8.51	0.13	6.85	8.66	YES
PYR_1	comp2697_c0_seq1	8.63	65.15	76	5.71	83.48	97.17	YES
PYR_2	comp7632_c0_seq1	3.79	2.74	6.12	2.19	2.86	3.86	YES
SNF1_1	comp565_c1_seq2	94.33	56.59	7.97	61.65	16.77	11.43	YES
SNF1_2	comp3518_c0_seq2	13.7	9.37	3.2	6.73	2.76	2.33	YES
SNF1_3	comp565_c1_seq1	229.13	162.76	25.46	222.26	48.23	40.61	YES
NCED_1	comp919_c0_seq1	33.61	106.8	262.66	13.92	138.83	141.87	YES
NCED_2	comp503_c0_seq1	43.45	190.58	279.57	16.74	307.04	251.48	YES
SDR_q	comp3434_c0_seq10	1.89	8.6	10.68	0.51	0.52	3.03	YES
SDR_2	comp3434_c0_seq11	15.08	7.74	9.23	2.15	13.41	12.83	YES
SDR_3	comp3434_c0_seq9	26.72	38.55	14.63	41.14	26.17	22.73	YES
MCSU_1	comp4653_c0_seq2	2.69	0.57	0.86	1.34	0.88	0.9	YES
MCSU_2	comp6631_c0_seq1	2.43	2.88	3.42	3.27	0.99	0.67	YES
MCSU_3	comp6631_c0_seq2	8.99	10.06	0.23	12.91	5.94	5.01	YES
AAO_1	comp1486_c0_seq1	0.44	0.42	1.61	1.23	1.73	3.41	YES
AAO_2	comp1486_c0_seq10	14.96	14.33	27.84	15.45	24.85	18.85	YES
ABA-induced_2	comp13249_c0_seq2	7.55	4.08	0.59	12.26	1.42	1.23	YES
ABA-induced_3	comp1907_c0_seq1	10.69	12.54	10.97	7.95	14.05	20.37	YES
ABA-induced_4	comp25520_c0_seq1	3.49	0.44	0.45	1.1	0.43	0.33	YES
ARM_4	comp10015_c0_seq1	4.21	4.49	9.23	7.39	8.24	12.83	YES
ARM_5	comp10124_c1_seq3	4.27	4.33	4.91	2.95	6.32	8.4	YES
ARM_6	comp10212_c0_seq1	6.99	10.88	21.28	7.9	13.04	13.13	YES
ARM_7	comp10473_c0_seq1	4.66	7.31	9.65	2.88	7.24	8.92	YES
ARM_8	comp10603_c0_seq5	1.04	0.85	1.41	1.79	1.76	4.99	YES
ARM_9	comp10781_c0_seq1	0.67	1.87	18.91	1.12	12.79	13.99	YES
ARM_10	comp10812_c0_seq3	1.54	2.55	2.12	3.07	3.82	1.15	YES
ARM_11	comp10990_c0_seq1	17.41	7.44	2.38	14.86	5.53	4.89	YES
SNF2_1	comp7556_c0_seq5	1.45	0.96	0.83	0.06	1.14	0.56	YES
SNF2_2	comp7556_c0_seq8	2.29	0.87	0.81	0.19	1.86	2.16	YES
bZIP_4	comp11793_c0_seq1	1.36	0.8	1.43	2.2	0.24	0.63	YES
Calmodulin_1	comp12095_c0_seq4	2.03	1.4	1.19	4.03	0.48	1.55	YES
MAP-kinase_3	comp12937_c0_seq1	14.76	7.83	2.74	6.66	5.84	4.75	YES
PYR_3	comp2530_c0_seq3	4.97	5.16	7.31	4.06	2.87	12.89	YES
PYR_4	comp2697_c0_seq1	8.63	65.15	76	5.71	83.48	97.17	YES
