# Supplementary material for: RNAseq, transcriptome analysis and identification of DEGs involved in development and ripening of Fragaria chiloensis fruit
Source: Front Plant Sci. 2022 Sep 20;13:976901. doi: 10.3389/fpls.2022.976901 (PMC9530326; doi:10.3389/fpls.2022.976901)
Supplement: Supplementary file 8 [file Data_Sheet_2.xlsx]

## Sheet: Fig.6
Heatmap_NAME	Sequence_ID	FPKM_C2	FPKM_C3	FPKM_C4	FPKM_RC2	FPKM_RC3	FPKM_RC4	ORF
Alpha-galactosidase_1-like	comp6619_c2_seq4	31.93	15.44	2.36	52.27	5.56	3.55	YES
Beta-galactosidase_8	comp11751_c0_seq6	0.83	1.58	0.21	1.02	0.9	1.95	YES
Beta-galactosidase_3	comp11845_c0_seq1	13.6	7	1.33	17.68	1.55	1.43	YES
Beta-galactosidase_16	comp294_c0_seq1	40.09	304.86	777.51	4.06	587.58	622.45	YES
Beta-galactosidase_17	comp3283_c1_seq8	0.92	2.99	0.18	1.33	2.31	2.61	YES
Beta-galactosidase_1	comp584_c0_seq1	415.63	285.17	76.33	461.13	91.58	124.3	YES
Beta-galactosidase_12	comp584_c0_seq2	99.5	58.22	23.59	95.75	21.47	23.51	YES
Beta-galactosidase_1	comp739_c0_seq3	27.96	59.14	25.87	42.27	21.79	18.08	YES
Beta-galactosidase_12	comp922_c0_seq1	258.86	157.44	43.53	268.99	57.41	70.67	YES
Expansin_A4	comp14194_c0_seq1	2.33	1.42	5.4	4.02	4.47	5.25	YES
Expansin_A8	comp26_c0_seq1	219.65	2057.58	3522.1	29.59	2932.06	2530.44	YES
Expansin_A8	comp26_c0_seq2	55.48	448.97	570.06	8.92	507.49	299.48	YES
Expansin_A8	comp26_c0_seq3	24.72	281.13	358.13	1.29	276.01	270.77	YES
Expansin-like_A1_1	comp3357_c0_seq2	79.84	21.58	7.78	63.63	6.03	8.94	YES
Expansin-like_A1_2	comp3357_c0_seq3	15.44	4.62	0.56	16.74	0.78	0.75	YES
Expansin_A1_1	comp3357_c0_seq3	15.44	4.62	0.56	16.74	0.78	0.75	YES
Expansin_A1_2	comp45_c0_seq2	66.75	491.22	814.57	28.25	948.66	884.83	YES
Expansin_A4	comp998_c0_seq1	10.49	50.45	319.36	10.05	313.06	297.24	YES
Pectin_lyase-like_1	comp2346_c0_seq1	44.37	91.72	112.94	17.98	116.08	87.46	YES
Pectin_lyase-like_2	comp24_c0_seq1	472.94	1814.66	2782.21	170.09	2899.49	2414.26	YES
Pectin_lyase-like_3	comp34_c0_seq1	77.57	529.12	823.41	17.46	766.48	562.13	YES
Pectin_lyase-like_4	comp34_c0_seq2	122.16	692.53	1244.48	45.57	1050.62	1285.73	YES
Pectin_lyase-like_5	comp47_c0_seq1	214.67	1154.96	1813.17	44.65	1813.08	1905.02	YES
Pectin_lyase-like_6	comp47_c0_seq1	214.67	1154.96	1813.17	44.65	1813.08	1905.02	YES
Pectin_methylesterase-1_1	comp300_c0_seq1	18.91	78.51	128.92	8.56	129.83	80.43	YES
Pectin_methylesterase-1_2	comp300_c0_seq2	35.1	195.08	434.12	16.82	405	323.05	YES
Pectin_methylesterase_ 61	comp957_c1_seq5	1.65	17.69	42.42	0.28	33.21	22.43	YES
Polygalacturonase_inhibiting	comp2020_c0_seq1	74.22	46.8	21.54	108.33	17.87	40.03	YES
Polygalacturonase_2	comp510_c0_seq1	60.36	170.07	610.57	61.86	564.21	483.53	YES
Xyloglucan_endotransglucosylase/hydrolase_1	comp10463_c0_seq1	8.42	1.17	0.71	0.35	0.34	0.97	YES
Xyloglucan_endotransglucosylase/hydrolase_2	comp10463_c0_seq2	0.45	1.4	24.31	0.11	10.24	14.18	YES
Xyloglucan_endotransglucosylase/hydrolase_3	comp15146_c0_seq1	7.08	3.52	1.95	12.45	1.05	3.13	YES
Xyloglucan_endotransglucosylase_1	comp24119_c0_seq1	0.16	0.43	2.47	0.13	2.2	3.58	YES
Xyloglucan_endotransglucosylase/hydrolase_4	comp470_c0_seq2	112.57	21.93	0.46	329.63	2.3	0.65	YES
Xyloglucan_endotransglucosylase/hydrolase_5	comp470_c0_seq3	174.12	19.63	0.44	601.71	1.8	0.01	YES
Xyloglucan_endotransglucosylase/hydrolase_6	comp470_c0_seq4	17.38	2.01	0.62	56.08	0.12	0.43	YES
