# Supplementary material for: RNAseq, transcriptome analysis and identification of DEGs involved in development and ripening of Fragaria chiloensis fruit
Source: Front Plant Sci. 2022 Sep 20;13:976901. doi: 10.3389/fpls.2022.976901 (PMC9530326; doi:10.3389/fpls.2022.976901)
Supplement: Supplementary file 9 [file Data_Sheet_3.xlsx]

## Sheet: Fig.7
Heatmap_NAME	Sequence_ID	FPKM_C2	FPKM_C3	FPKM_C4	FPKM_RC2	FPKM_RC3	FPKM_RC4	ORF
PAL_1	comp11210_c0_seq1	1.8	1.3	23.68	2.73	11.86	13.69	YES
PAL_2	comp262_c0_seq1	12.97	64.21	104.97	6.4	96.77	130.51	YES
C4H_1	comp10446_c0_seq1	25.07	3.44	2.8	17.45	2.32	3.09	YES
4CL_1	comp24319_c0_seq1	5.13	0.58	0.19	3.66	0.17	0.21	YES
4CL_2	comp5021_c0_seq1	64.84	25.91	7.48	82.41	13.55	9.15	YES
CCR_1	comp9194_c0_seq1	22.55	9.2	3.93	22.03	4.8	4.52	YES
CAD_1	comp377_c0_seq1	6.94	57.04	234.59	2.33	194.88	283.92	YES
HCT_1	comp1075_c0_seq1	43.53	74.1	151.3	39.02	150.94	139.08	YES
HCT_2	comp13496_c0_seq7	0	0.22	0.63	0	0.78	0.27	YES
CCoAOMT_1	comp14309_c0_seq1	11.54	2.7	1.64	18.34	1.29	1.31	YES
F5H_1	comp19753_c0_seq2	4.09	1.06	0.65	1.65	1.98	1.24	YES
F5H_2	comp4980_c0_seq1	13.19	18.1	28.13	13.29	26.02	27.9	YES
COMT_1	comp1483_c0_seq1	0.49	6.15	381.24	0.66	119.52	215.64	YES
COMT_2	comp85_c0_seq1	142	777.26	836.9	68.21	1035.61	713.73	YES
CHS_1	comp860_c0_seq5	1.89	15.87	91.19	8.28	31.84	0.05	YES
CHI_1	comp11458_c0_seq1	2.26	4.66	7.51	6.48	5.2	1.56	YES
CHI_2	comp355_c0_seq1	108.77	252.13	451.85	167.43	394.35	410.31	YES
CHI_3	comp8158_c0_seq1	2.41	2.56	14.38	6.16	10.38	11.41	YES
F3H_1	comp1934_c0_seq1	12.37	29.92	134.21	18.74	97.42	88.92	YES
F3'H_1	comp40457_c0_seq1	0.58	0.18	0.15	1.44	0	0.24	YES
DFR_1	comp10027_c0_seq3	0.16	0.16	0.83	0	0.54	2.58	YES
DFR_2	comp221_c0_seq1	23.99	26.15	23.25	30.45	20.94	29.95	YES
DFR_3	comp8984_c0_seq1	0.44	0.6	1.01	1.43	0.12	1.53	YES
ALDH_1	comp2192_c0_seq1	3.35	2.7	1.32	0.89	3.63	4.45	YES
ALDH_2	comp5078_c0_seq4	0.21	2.64	2.24	2.81	1.34	0.97	YES
ALDH_3	comp7071_c0_seq2	9.5	14.66	8.23	19.69	4.87	6.53	YES
ANS_1	comp523_c0_seq1	116.52	206.43	516.14	182.46	458.33	384.39	YES
FLS_1	comp73871_c0_seq1	0	0.66	0	0.85	0	0	YES
FLS_2	comp38549_c0_seq1	1.32	0.28	0.34	0.92	0.15	0.2	YES
OMT_1	comp1483_c0_seq1	0.49	6.15	381.24	0.66	119.52	215.64	YES
OMT_2	comp24025_c0_seq1	0.78	0.7	0.86	3.48	1.32	0.73	YES
OMT_3	comp330_c0_seq1	9.75	55.11	245.31	3.12	171.38	232.28	YES
UFGT_1	comp22798_c0_seq1	0.14	0.69	4.21	0.35	3.7	3.19	YES
UFGT_2	comp2402_c0_seq10	1.7	17.97	14.33	8.01	1.84	6.53	YES
UFGT_3	comp844_c1_seq2	5.96	4.78	7.79	4.19	3.94	2.7	YES
